# Supplementary material
Source: PubMed Central journal article supplement (PMC6879856)
Supplement: NIHMS1540588-supplement-Legacy_Supplemental_File.pdf [file NIHMS1540588-supplement-Legacy_Supplemental_File.pdf]

## **SUPPLEMENTAL MATERIALS**

### **Anti-inflammatory effects of HDL in macrophages predominate over pro-inflammatory effects in atherosclerotic plaques**

Panagiotis Fotakis PhD<sup>1</sup>, Vishal Kothari PhD<sup>2</sup>, David G. Thomas PhD<sup>1</sup>, Marit Westerterp PhD<sup>1,4</sup>, Matthew M. Molusky PhD<sup>1</sup>, Elissa Altin MD<sup>1</sup>, Sandra Abramowicz MA<sup>1</sup>, Nan Wang PhD<sup>1</sup>, Yi He PhD<sup>2</sup>, Jay W. Heinecke MD<sup>2</sup>, Karin E. Bornfeldt PhD<sup>2,3,\*,#</sup>, Alan R. Tall MBBS<sup>1,\*,#</sup>

<sup>1</sup> Division of Molecular Medicine, Department of Medicine, Columbia University, New York, NY; <sup>2</sup> Department of Medicine, Division of Metabolism, Endocrinology and Nutrition, UW Medicine Diabetes Institute, <sup>3</sup> Department of Pathology, University of Washington, Seattle, WA; <sup>4</sup> Department of Pediatrics, University of Groningen, University Medical Center Groningen, Groningen, The Netherlands

\* These authors contributed equally to this work.

# Address correspondence to:

Alan R. Tall MBBS

Division of Molecular Medicine, Department of Medicine

Columbia University

630 West 168 Street P&S 8-401

New York NY 10032, USA

Phone: 212-305-9418; Fax: 212-305-5052

E-mail: [art1@cumc.columbia.edu](mailto:art1@cumc.columbia.edu)

Karin E. Bornfeldt PhD

Department of Medicine, Division of Metabolism, Endocrinology and Nutrition, UW Medicine Diabetes Institute

University of Washington

750 Republican Street, Box 358062

Seattle, WA 98109

Phone: 206-543-1681; Fax: 206-543-3567

E-mail: [kbornfeldt@medicine.washington.edu](mailto:kbornfeldt@medicine.washington.edu)

## Supplemental Tables and Figures

**Supplemental Table I: Top 20 GO categories associated with rHDL-induced genes**

| GO biological process complete                                         | # Genes | Fold Enrichment | Bonferroni-adjusted P |
|------------------------------------------------------------------------|---------|-----------------|-----------------------|
| cholesterol biosynthetic process (GO:0006695)                          | 14      | 13.22           | 7.43E-08              |
| chemokine-mediated signaling pathway (GO:0070098)                      | 11      | 5.93            | 3.37E-02              |
| macroautophagy (GO:0016236)                                            | 17      | 5.09            | 7.58E-04              |
| vacuole organization (GO:0007033)                                      | 19      | 4.42            | 1.17E-03              |
| regulation of GTPase activity (GO:0043087)                             | 28      | 2.87            | 9.99E-03              |
| carboxylic acid biosynthetic process (GO:0046394)                      | 25      | 2.84            | 4.36E-02              |
| phospholipid metabolic process (GO:0006644)                            | 27      | 2.82            | 2.06E-02              |
| carbohydrate derivative biosynthetic process (GO:1901137)              | 43      | 2.67            | 1.06E-04              |
| organophosphate biosynthetic process (GO:0090407)                      | 33      | 2.5             | 2.19E-02              |
| regulation of protein kinase activity (GO:0045859)                     | 47      | 2.16            | 9.59E-03              |
| oxidation-reduction process (GO:0055114)                               | 60      | 2.1             | 8.75E-04              |
| organonitrogen compound biosynthetic process (GO:1901566)              | 72      | 1.98            | 4.54E-04              |
| chemical homeostasis (GO:0048878)                                      | 66      | 1.85            | 1.54E-02              |
| positive regulation of catalytic activity (GO:0043085)                 | 64      | 1.85            | 2.26E-02              |
| regulation of intracellular signal transduction (GO:1902531)           | 97      | 1.74            | 9.17E-04              |
| positive regulation of cellular protein metabolic process (GO:0032270) | 84      | 1.68            | 2.39E-02              |
| regulation of cellular component organization (GO:0051128)             | 135     | 1.64            | 6.39E-05              |
| organic substance transport (GO:0071702)                               | 97      | 1.63            | 1.44E-02              |
| cellular localization (GO:0051641)                                     | 106     | 1.61            | 8.52E-03              |
| regulation of localization (GO:0032879)                                | 136     | 1.48            | 1.72E-02              |

**Supplemental Table II: Top 20 GO categories associated with rHDL-repressed genes**

| <b>GO biological process complete</b>                                | <b># Genes</b> | <b>Fold Enrichment</b> | <b>Bonferroni-adjusted P</b> |
|----------------------------------------------------------------------|----------------|------------------------|------------------------------|
| cytokine biosynthetic process (GO:0042089)                           | 7              | 15.3                   | 4.52E-03                     |
| cellular response to interferon-beta (GO:0035458)                    | 14             | 11.77                  | 3.19E-07                     |
| microglial cell activation (GO:0001774)                              | 7              | 10.93                  | 4.07E-02                     |
| phospholipid transport (GO:0015914)                                  | 13             | 7.89                   | 1.75E-04                     |
| regulation of interleukin-1 beta production (GO:0032651)             | 10             | 6.56                   | 3.74E-02                     |
| defense response to virus (GO:0051607)                               | 29             | 6.09                   | 2.76E-10                     |
| positive regulation of tumor necrosis factor production (GO:0032760) | 14             | 5.88                   | 1.77E-03                     |
| positive regulation of leukocyte migration (GO:0002687)              | 23             | 5.63                   | 5.80E-07                     |
| positive regulation of interleukin-6 production (GO:0032755)         | 13             | 5.26                   | 1.62E-02                     |
| negative regulation of T cell activation (GO:0050868)                | 17             | 5.16                   | 5.87E-04                     |
| positive regulation of leukocyte chemotaxis (GO:0002690)             | 13             | 4.96                   | 3.07E-02                     |
| leukocyte migration (GO:0050900)                                     | 25             | 4.41                   | 1.26E-05                     |
| leukocyte chemotaxis (GO:0030595)                                    | 15             | 4.2                    | 4.06E-02                     |
| positive regulation of lymphocyte proliferation (GO:0050671)         | 17             | 4.13                   | 1.23E-02                     |
| positive regulation of innate immune response (GO:0045089)           | 19             | 4.02                   | 4.49E-03                     |
| regulation of lymphocyte differentiation (GO:0045619)                | 19             | 3.8                    | 1.02E-02                     |
| regulation of T cell proliferation (GO:0042129)                      | 19             | 3.8                    | 1.02E-02                     |
| regulation of cytokine secretion (GO:0050707)                        | 20             | 3.64                   | 1.01E-02                     |
| positive regulation of cytokine production (GO:0001819)              | 39             | 3.31                   | 1.49E-06                     |
| response to lipopolysaccharide (GO:0032496)                          | 23             | 3.2                    | 1.48E-02                     |

**Supplemental Table III: GO categories associated with rHDL-induced and rHDL-repressed genes in cholesterol loaded macrophages**

| <b>GO biological process complete for rHDL-induced genes</b>   | <b># Genes</b> | <b>Fold Enrichment</b> | <b>Bonferroni-adjusted P</b> |
|----------------------------------------------------------------|----------------|------------------------|------------------------------|
| cholesterol biosynthetic process (GO:0006695)                  | 5              | > 100                  | 2.29E-12                     |
| oxidation-reduction process (GO:0055114)                       | 7              | 12.04                  | 5.53E-03                     |
| <b>GO biological process complete for rHDL-repressed genes</b> |                |                        |                              |
| <b>GO biological process complete for rHDL-repressed genes</b> | <b># Genes</b> | <b>Fold Enrichment</b> | <b>Bonferroni-adjusted P</b> |
| response to endoplasmic reticulum stress (GO:0034976)          | 7              | 23.87                  | 1.33E-04                     |
| protein folding (GO:0006457)                                   | 5              | 21.54                  | 2.99E-02                     |

**Supplemental Table IV: rHDL-induced cholesterol biosynthetic genes in cholesterol loaded and non-cholesterol loaded macrophages**

| <b>Non-cholesterol loaded macrophages</b> | <b>Cholesterol loaded macrophages</b> |
|-------------------------------------------|---------------------------------------|
| Dhcr24                                    | Dhcr24                                |
| Hmgcr                                     | Sc5d                                  |
| Nsdhl                                     | Fdft1                                 |
| Insig1                                    | Cyp51                                 |
| Sc5d                                      | Hsd17b7                               |
| Cyb5r3                                    |                                       |
| Tm7sf2                                    |                                       |
| Lss                                       |                                       |
| Dhcr7                                     |                                       |
| Fdft1                                     |                                       |
| Cyp51                                     |                                       |
| Fdps                                      |                                       |
| Hsd17b7                                   |                                       |
| Pmvk                                      |                                       |

**Supplemental Table V: List of primers**

| Gene                | Forward sequence                                    | Reverse sequence                                  |
|---------------------|-----------------------------------------------------|---------------------------------------------------|
| <u>Mouse</u>        |                                                     |                                                   |
| <i>M36b4</i>        | CCTGAAGTGCTCGACATCAC                                | CCACAGACAATGCCAGGAC                               |
| <i>Tnfa</i>         | CCAGACCCTCACACTCAGATC or<br>CCCTCACACTCAGATCATCTTCT | CACTTGGTGGTTTGCTACGAC or<br>GCTACGACGTGGGCTACAG   |
| <i>Ccl2</i>         | CCCAATGAGTAGGCTGGAGA or<br>TTAAAAACCTGGATCGGAACCAA  | TCTGGACCCATTCTTCTTG or<br>GCATTAGCTTCAGATTTACGGGT |
| <i>Cxcl1</i>        | CCCAAACCGAAGTCATAGCC or<br>TGGCTGGGATTCACCTCAAG     | TGGGGACACCTTTTAGCATC or<br>CCGTTACTTGGGGACACCTT   |
| <i>Cxcl2</i>        | AGTGAAGTGCCTGTCAATG                                 | TTAGCCTTGCCTTTGTTCAG                              |
| <i>Il1b</i>         | TGTGAATGCCACCTTTTGACA or<br>GGGCTGCTTCCAAACCTTTG    | GGTCAAAGGTTTGGAAGCAG or<br>TGATACTGCCTGCCTGAAGCTC |
| <i>Il6</i>          | ACAACCACGGCCTTCCCTACTT                              | CACGATTTCCAGAGAACATGTG                            |
| <i>Ifit3</i>        | AGTGAGGTCAACCGGGAATCT                               | TCTAGGTGCTTTATGTAGGCCA                            |
| <i>Mx1</i>          | AAACCTGATCCGACTTCACTTCC                             | TGATCGTCTTCAAGGTTTCCTTGT                          |
| <i>Ifnβ</i>         | TGAACTCCACCAGCAGACAG                                | AAGATCTCTGCTCGGACCAC                              |
| <i>Oasl1</i>        | CCAGGAAGAAGCCAAGCACCATC                             | AGGTTACTGAGCCCAAGTCCATC                           |
| <i>Abca1</i>        | CAGCTTCCATCCTCCTTGTC                                | CCACATCCACAACCTGTCTGG                             |
| <i>Hmgcr</i>        | TTTCTGGCGCTTTCAGAGAC or<br>GACTGTGGTTTGTGAAGCCG     | TTAACCACGGAGAGGTGAG or<br>GTTGTAGCCGCCTATCGTCC    |
| <i>Atf3</i>         | GAGCTGAGATTCGCCATCCA                                | CCGCCTCCTTTCTCTCAT                                |
| <i>Ddit3</i>        | CCACCACACCTGAAAGCAGAA                               | AGGTGAAAGGCAGGGACTCA                              |
| <i>Spliced Xbp1</i> | CTGAGTCCGAATCAGGTGCAG                               | GTCCATGGGAAGATGTTCTGG                             |
| <i>total Xbp1</i>   | TGGCCGGGTCTGCTGAGTCCG                               | GTCCATGGGAAGATGTTCTGG                             |
| <i>Rn18S</i>        | CATTAATCAGTTATGGTTCCTTTGG                           | CCCGTCGGCATGTATTAGCT                              |
| <u>Human</u>        |                                                     |                                                   |
| <i>TNFA</i>         | CCTCTCTAATCAGCCCTCTG                                | GAGGACCTGGGAGTAGATGAG                             |
| <i>CCL2</i>         | CAGCCAGATGCAATCAATGCC                               | TGGAATCCTGAACCCACTTCT                             |
| <i>CXCL1</i>        | CCAGCTCTTCCGCTCCTC                                  | CACGGACGCTCCTGCTG                                 |

Supplemental Figure I (related to Figure 1)

A

rHDL effect on gene expression  
(fold change >1.5, FDR ≤ 0.05)

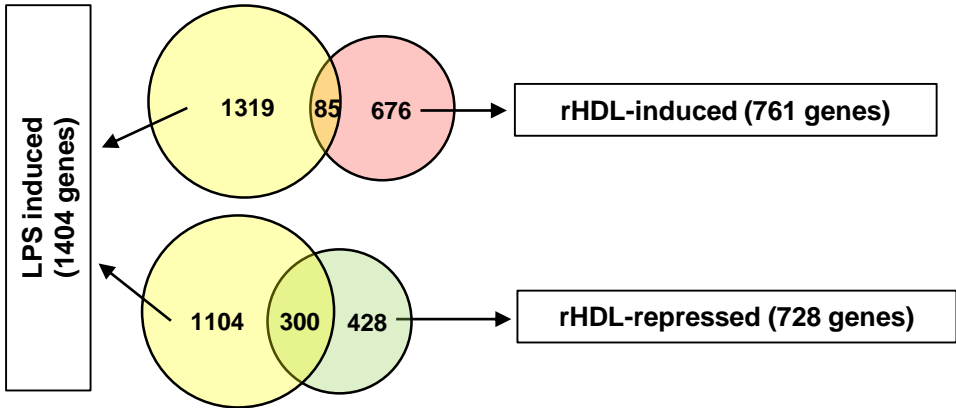

B

rHDL-induced genes

| Motif | Known match | p-value | q-value |
|-------|-------------|---------|---------|
|       | MITF        | 1E-10   | <0.0001 |
|       | Usf2        | 1E-9    | <0.0001 |
|       | CLOCK       | 1E-9    | <0.0001 |
|       | TFE3        | 1E-8    | <0.0001 |
|       | bHLHE40     | 1E-8    | <0.0001 |
|       | JunB        | 1E-2    | 0.0385  |
|       | CEBP        | 1E-2    | 0.0578  |
|       | AP-1        | 1E-2    | 0.0845  |

Supplemental Figure I; Related to Figure 1

Wild type BMDMs were treated for 20 hours with 150 µg/ml rHDL (reconstituted HDL), washed with PBS and stimulated with 100 ng/mL LPS for 4 hours and harvested for RNA-Seq (n=3/condition). For cholesterol loading (CL) macrophages were incubated with POPC/cholesterol-liposomes (~ 1 mg cholesterol/ml) for 20 hours prior to rHDL treatment. (A) Overall gene expression changes from RNA-seq and (B, C) HOMER *de novo* motif enrichment in rHDL-induced genes and rHDL-repressed genes.

C

rHDL-repressed genes

| Motif | Known match | p-value | q-value |
|-------|-------------|---------|---------|
|       | ISRE        | 1E-21   | <0.0001 |
|       | IRF1        | 1E-18   | <0.0001 |
|       | IRF3        | 1E-18   | <0.0001 |
|       | IRF2        | 1E-16   | <0.0001 |
|       | IRF8        | 1E-13   | <0.0001 |
|       | AP-1        | 1E-4    | 0.0043  |

# Supplemental Figure II (related to Figure 2)

**A**

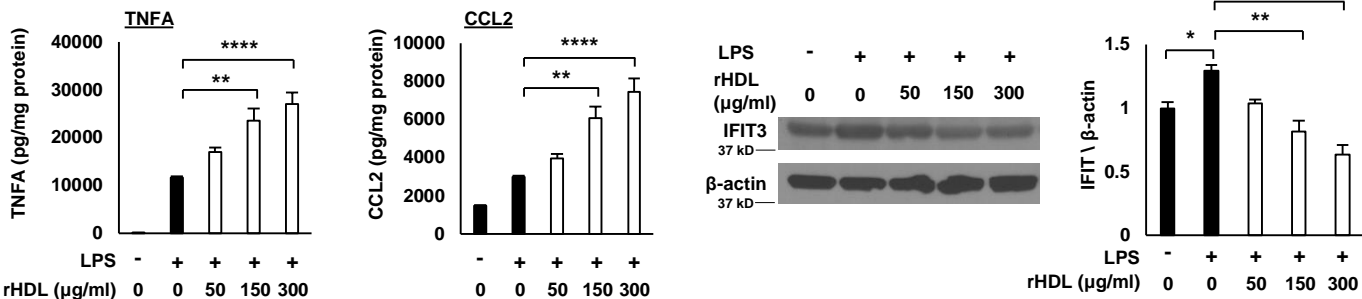

**B**

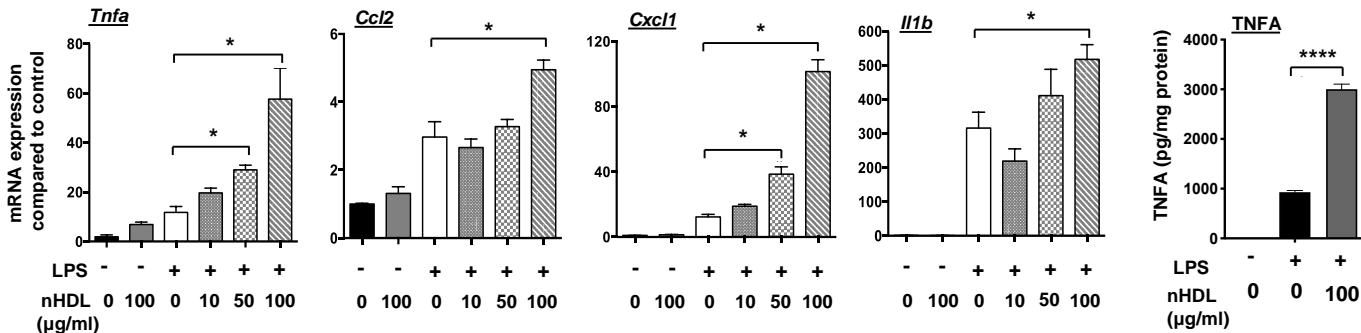

**C**

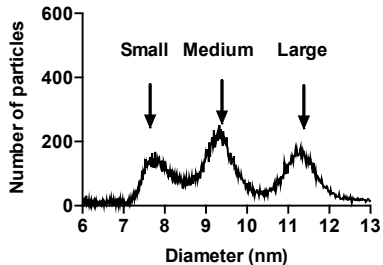

**D**

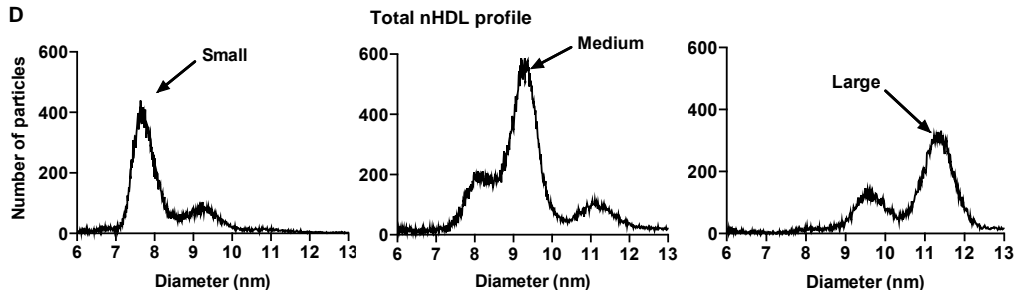

**E**

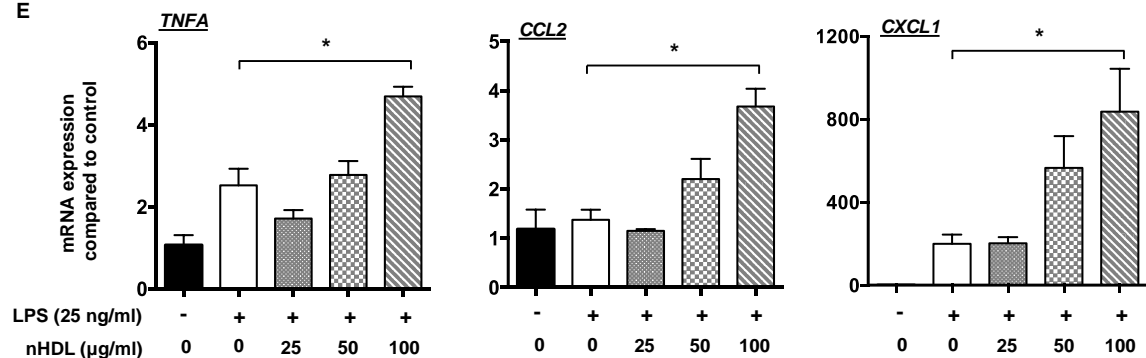

**F**

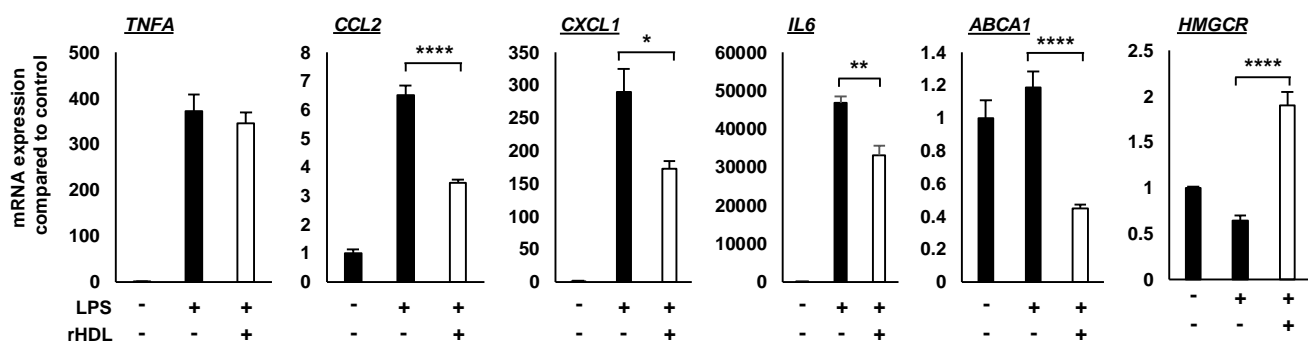

**Supplemental Figure II (continued) (related to Figure 2)**

**G Gene expression in thioglycollate-elicited peritoneal macrophages**

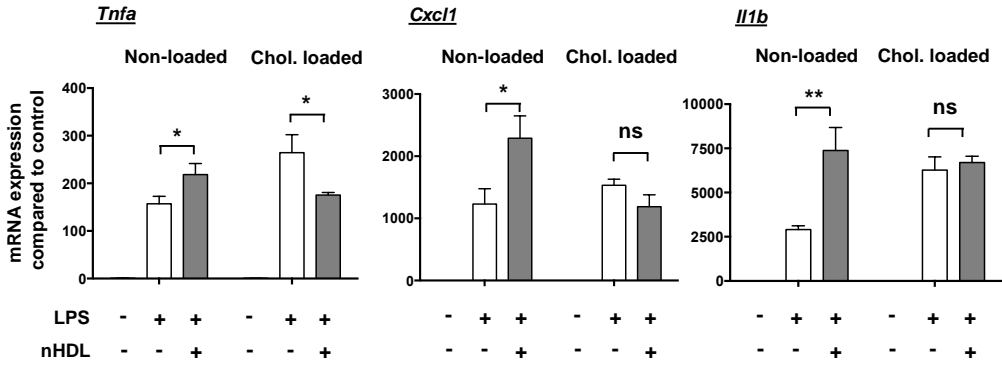

**H**

LPS control  
 POPC-liposomes → LPS  
 POPC/chol.-liposomes → POPC-liposomes → LPS

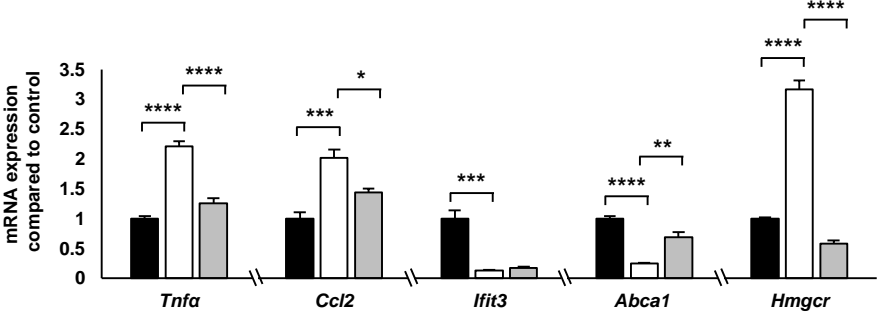

**I**

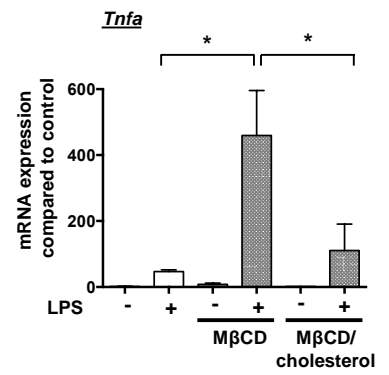



## Supplemental Figure II; Related to Figure 2

Macrophages were treated for 18-20 hours with rHDL (reconstituted HDL) or nHDL (native HDL), washed with PBS and stimulated with LPS. For altering cholesterol content, macrophages were incubated with AcLDL prior to nHDL treatment. (A) Dose effect of rHDL on TNFA and CCL2 secretion and IFIT3 protein expression in LPS-stimulated (100 ng/ml, 4 hours) BMDMs, (B) Dose effect of isolated total nHDL on LPS-stimulated (10 ng/ml, 4 hours) inflammatory gene expression and TNFA secretion in BMDMs. (C) Profile of nHDL isolated from *APOA1<sup>Tg</sup> Ldlr<sup>-/-</sup>* mice by ultracentrifugation determined by calibrated ion mobility analysis. (D) Profile of different nHDL subpopulations (small, medium and large) fractionated by FPLC, as determined by calibrated ion mobility analysis. (E) nHDL dose response in LPS-stimulated (25 ng/ml, 4 hours) THP-1 cells. (F) Effect of rHDL (150 µg/ml) on inflammatory gene expression in LPS-stimulated (100 ng/ml, 4 hours) human PBMC-derived macrophages. (G) Effect of nHDL on LPS-induced (10 ng/ml, 4 hours) inflammatory gene expression in thioglycollate-elicited macrophages loaded with cholesterol by AcLDL prior to nHDL treatment (50 µg/ml, 48 hours). (H) Effect of POPC-liposomes on LPS-induced (100 ng/ml, 4 hours) inflammatory gene expression in BMDMs pre-treated with POPC/cholesterol-liposomes (~ 1 mg cholesterol/ml) for 20 hours, prior to POPC-liposomes treatment. (I) Effect of methyl-β-cyclodextrin (MβCD) (10 µM, 4 hours) or MβCD complexed with cholesterol (100 µg/ml, 4 hours) on LPS-induced (10 ng/ml, 4 hours) *Tnfa* expression in BMDMs. The results are shown as mean ± SEM (n=4). Tests for normality (Shapiro-Wilk) and equal variance (Brown-Forsythe) were performed for each of the data sets. Significance was determined by one-way ANOVA with Tukey's multiple comparisons test (A, Western blot data, and B, E, F, G, H, I) or nonparametric Kruskal-Wallis with Dunn's multiple comparisons test (A, ELISA data), \*p<0.05, \*\*p<0.01, \*\*\*p<0.001, \*\*\*\*p<0.0001. Data are representative of at least two independent experiments.

Supplemental Figure III (related to Figure 4)

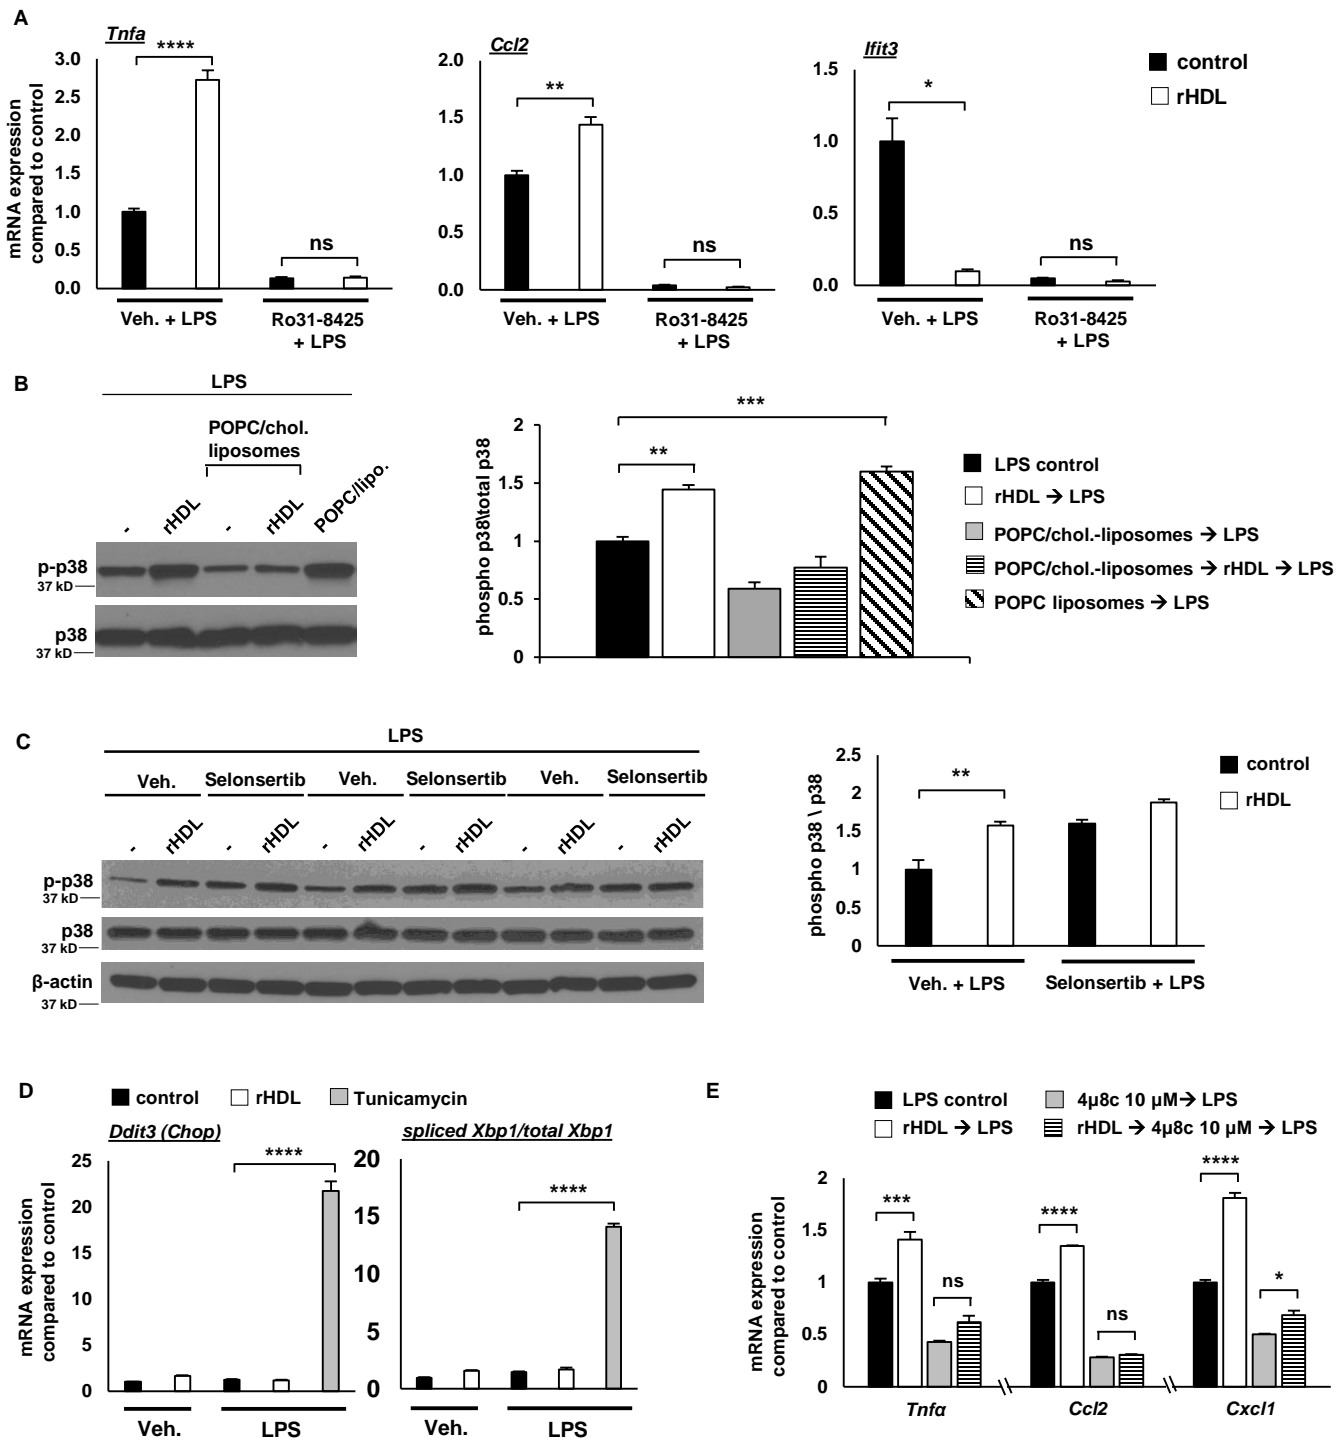

### Supplemental Figure III; Related to Figure 4

Wild type BMDMs were treated for 20 hours with rHDL, washed with PBS and stimulated with LPS, as described below. Macrophages were treated with the indicated inhibitors after removing rHDL and washing the cells, but prior to LPS stimulation and remained in the medium during the LPS stimulation. For altering cholesterol content, macrophages were incubated with POPC/cholesterol-liposomes (to load them with cholesterol) prior to rHDL treatment or cholesterol-free POPC-liposomes (instead of rHDL, to remove cholesterol). (A) Effect of rHDL (150  $\mu\text{g/ml}$ ) and Protein Kinase C (PKC) inhibitor (Ro31-8425, 10  $\mu\text{M}$ , added 2 hours prior to LPS) on inflammatory gene expression in LPS-stimulated (100 ng/ml, 4 hours) BMDMs. (B) Effect of rHDL (150  $\mu\text{g/ml}$ ) on p38 MAPK phosphorylation in BMDMs pre-treated with POPC/cholesterol-liposomes ( $\sim 1$  mg cholesterol/ml) for 20 hours or cells pre-treated with POPC-liposomes alone and stimulated with LPS (100 ng/ml, 4 hours). (C) Effect of rHDL (150  $\mu\text{g/ml}$ ) and ASK1 inhibitor (Selonsertib, 10  $\mu\text{M}$ , added 2 hours prior to LPS) on p38 MAPK phosphorylation in LPS-stimulated (100 ng/ml, 4 hours) BMDMs. (D) Effect of rHDL (300  $\mu\text{g/ml}$ ) and the ER stressor Tunicamycin (Tm, 2.5  $\mu\text{g/ml}$ , added 2 hours prior to LPS) on ER stress gene expression in LPS-stimulated (100 ng/ml, 4 hours) BMDMs. (E) Effect of rHDL (300  $\mu\text{g/ml}$ ) and the IRE1a kinase inhibitor (4 $\mu$ 8c, 10  $\mu\text{M}$ , added 1 hour prior to LPS) on inflammatory gene expression in LPS-stimulated (100 ng/ml, 4 hours) BMDMs. The results are shown as mean  $\pm$  SEM ( $n=4$  for gene expression,  $n=3$  for protein expression). Tests for normality (Shapiro-Wilk) and equal variance (Brown-Forsythe) were performed for each of the data sets. Significance was determined by unpaired  $t$  test with Welch's correction (A), one-way ANOVA with Tukey's multiple comparisons test (B, C, D, E), \* $p<0.05$ , \*\* $p<0.01$ , \*\*\* $p<0.001$ , \*\*\*\* $p<0.0001$ . Data are representative of at least two independent experiments.

# Supplemental Figure IV (related to Figure 5)

**A**

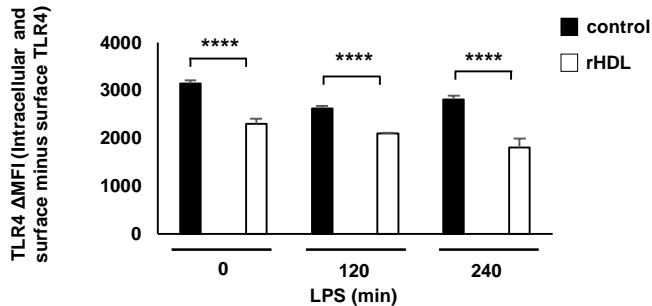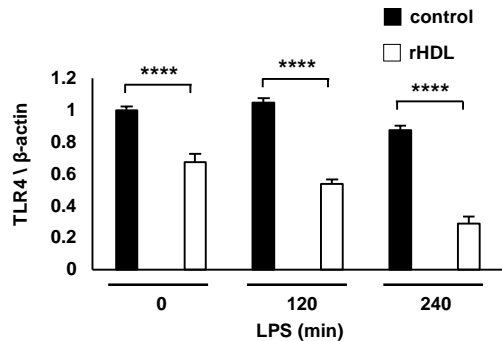

**B**

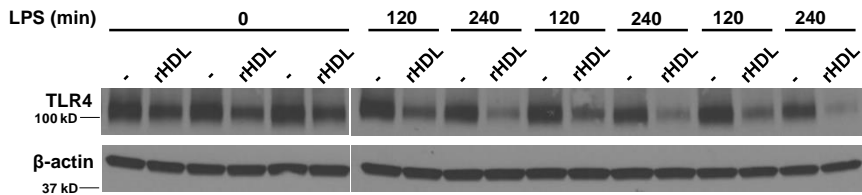

**C**

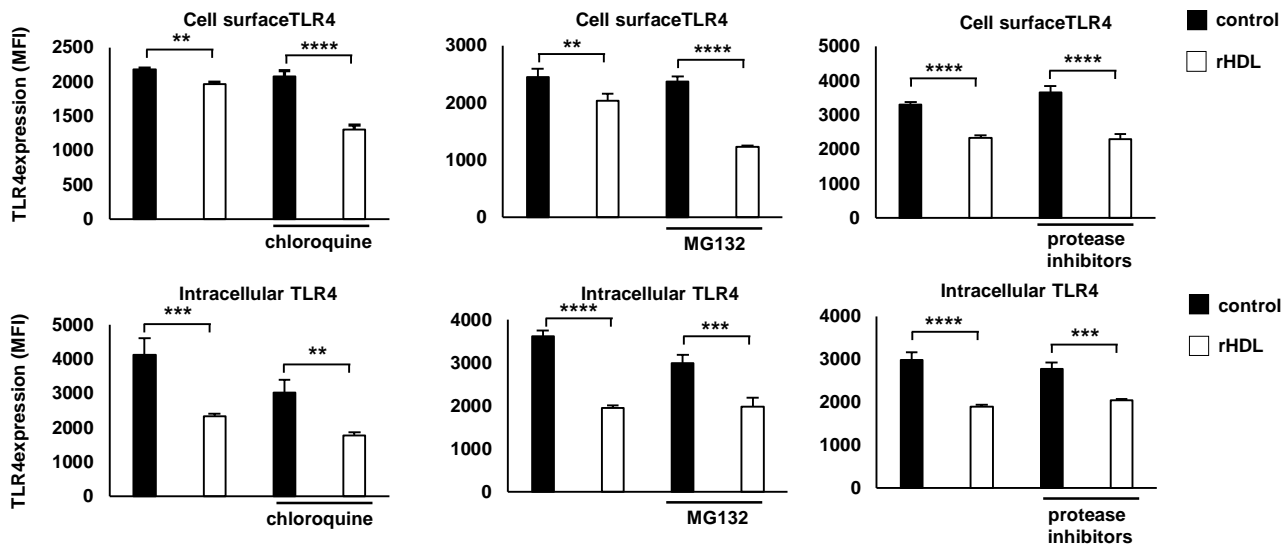

**D**

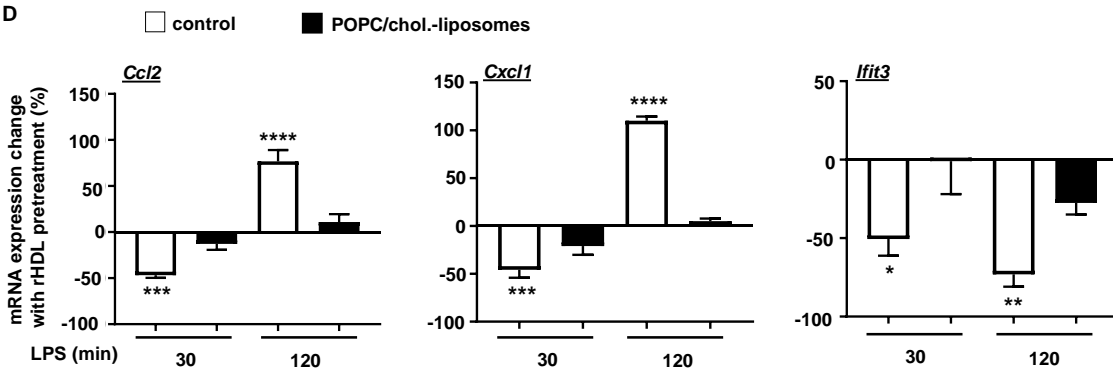

**E**

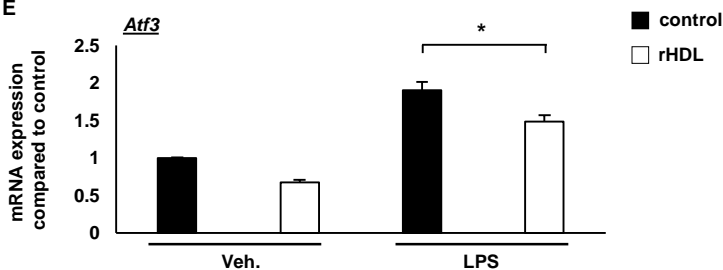

## Supplemental Figure IV; Related to Figure 5

Wild type BMDMs were treated for 20 hours with rHDL, washed with PBS and stimulated with LPS, as described below. For altering cholesterol content, macrophages were incubated with POPC/cholesterol-liposomes prior to rHDL treatment to load them with cholesterol. (A) Effect of rHDL (150 µg/ml) on total TLR4 protein expression assessed by flow cytometry and (B) total TLR4 protein levels assessed by Western blot in LPS-stimulated (100 ng/ml) BMDMs at the indicated time points. (C) Effect of rHDL (150 µg/ml) on cell surface and intracellular TLR4 expression assessed by flow cytometry in BMDMs treated with chloroquine (50 µM) or MG132 (10 µM) or protease inhibitors (Pepstatin 10 µM, Leupeptin 20 µM, E64 20 µM, Calpeptin 10 µM). Chloroquine, MG132 or the protease inhibitors were added during the last 4-6 hours of the rHDL treatment. (D) Effect of rHDL (150 µg/ml) on inflammatory gene expression in LPS-stimulated (100 ng/ml, time points 30 and 120 minutes) in BMDMs pre-treated with POPC/cholesterol-liposomes (~ 1 mg cholesterol/ml) for 20 hours BMDMs prior to rHDL. Results are expressed as the change of mRNA expression in rHDL treated versus non-treated cells. (E) Effect of rHDL (150 µg/ml) on *Atf3* expression in LPS-stimulated (100 ng/ml, 4 hours) BMDMs. The results are shown as mean ± SEM (n=4 for gene expression, n=3 for protein expression). Tests for normality (Shapiro-Wilk) and equal variance (Brown-Forsythe) were performed for each of the data sets. Significance was determined by two-way ANOVA with Sidak's post-hoc test (A, B, D) or by one-way ANOVA with Tukey's multiple comparisons test (C, E), \*p<0.05, \*\*p<0.01, \*\*\*p<0.001, \*\*\*\*p<0.0001. Data are representative of at least two independent experiments.

## Supplemental Figure V (related to Figure 5)

A

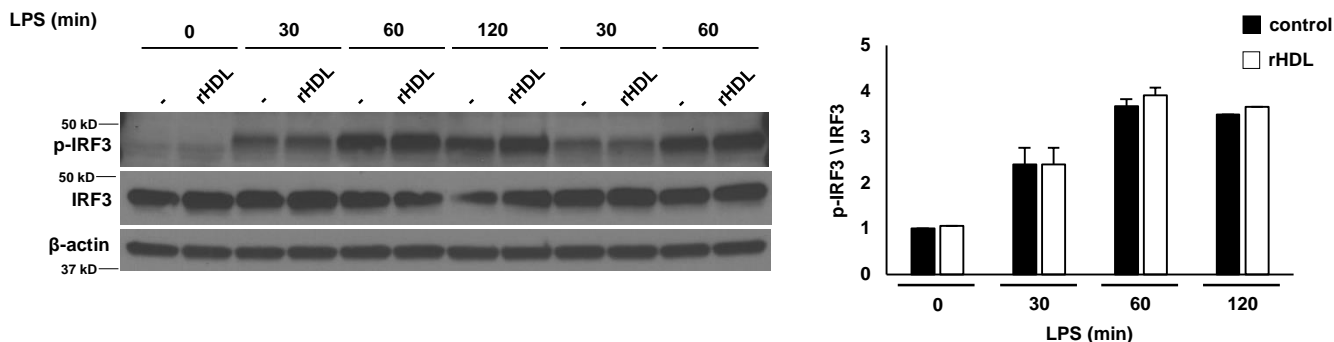

B

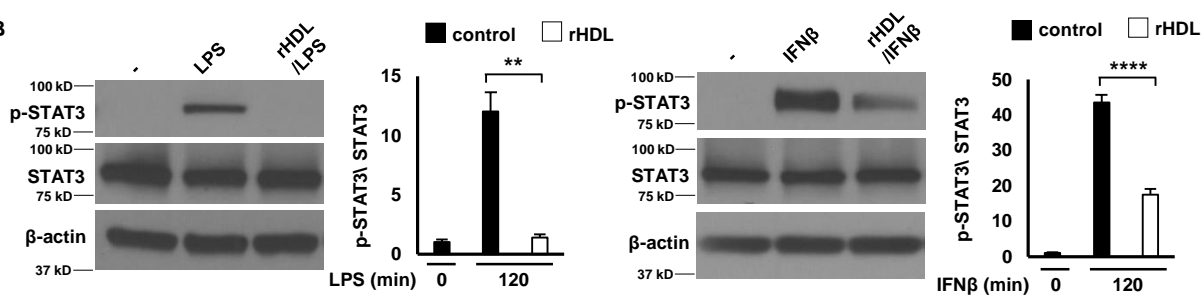

## Supplemental Figure V; Related to Figure 5

Wild type BMDMs were treated for 20 hours with rHDL, washed with PBS and stimulated with LPS, as described below. (A) Effect of rHDL (150  $\mu$ g/ml) on IRF3 phosphorylation in LPS-stimulated (100 ng/ml) BMDMs at the indicated time points. (B) Effect of rHDL (150  $\mu$ g/ml) on STAT3 phosphorylation in LPS-stimulated (100 ng/ml) or IFN $\beta$ -stimulated (5 ng/ml, 2 hours) BMDMs. The results are shown as mean  $\pm$  SEM (n=3). Tests for normality (Shapiro-Wilk) and equal variance (Brown-Forsythe) were performed for each of the data sets. Significance was determined by two-way ANOVA with Sidak's post-hoc test (A) or by unpaired *t* test with Welch's correction (B), \*\**p*<0.01, \*\*\*\**p*<0.0001. Data are representative of at least two independent experiments.

**Supplemental Figure VI (related to Figure 6)**

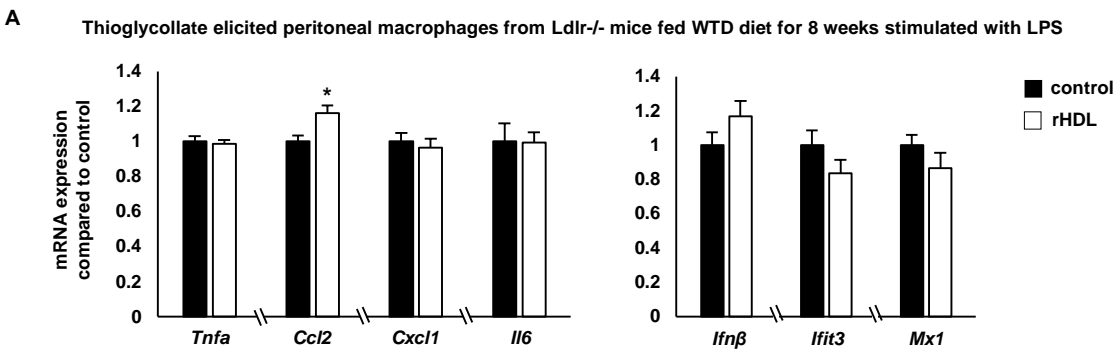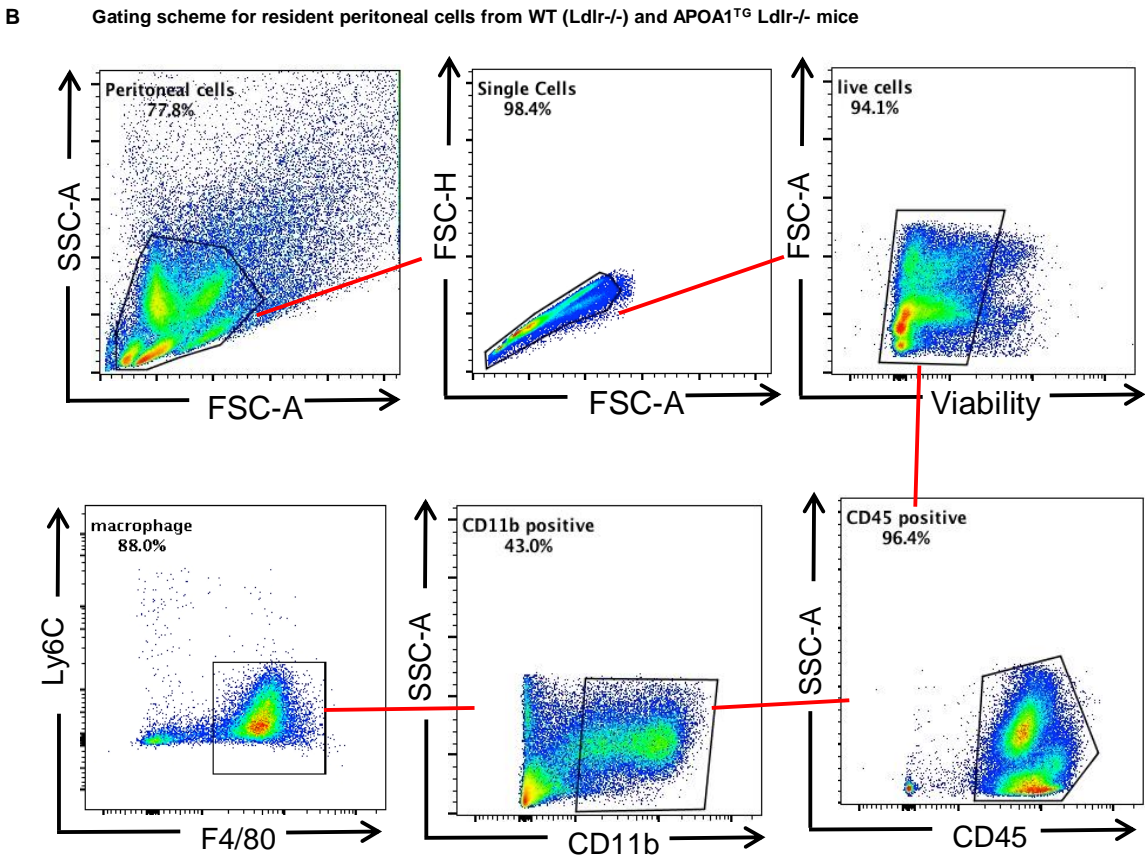

Peritoneal macrophages in WT and *APOA1*<sup>TG</sup> mice before adhesion purification

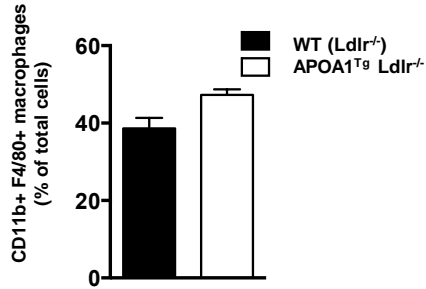

## Supplemental Figure VI; Related to Figure 6

(A) *Ldlr*<sup>-/-</sup> mice fed a WTD diet for 8 weeks were injected intravenously with 80 mg/Kg rHDL (n=5) or PBS daily (n=5), for a total of 5 days before sacrificing the mice 2 hours after the last rHDL injection. Thioglycollate was injected intraperitoneally 3 days before sacrificing the mice and peritoneal macrophages were collected, stimulated with LPS (100 ng/ml, 2 h) and inflammatory gene expression was assessed. (B) CD11b<sup>+</sup> F4/80<sup>+</sup> resident macrophages from *Ldlr*<sup>-/-</sup> and *APOA1*<sup>Tg</sup>;*Ldlr*<sup>-/-</sup> mice (n=4). The gating scheme for characterization of resident peritoneal macrophages is shown, as is the % macrophages (Cd11b<sup>+</sup> F4/80<sup>+</sup> population) before adhesion purification. The results are shown as mean ± SEM. Significance was determined by multiple t-tests using the two-stage linear step-up procedure of Benjamini, Krieger and Yekutieli, with Q = 5%, \*p<0.05



## Major Resources Tables

### Animals (in vivo studies)

| Species                     | Vendor or Source                      | Background Strain | Sex    |
|-----------------------------|---------------------------------------|-------------------|--------|
| C57BL/6J                    | The Jackson Laboratory Cat# 000664    | C57BL/6J          | Female |
| B6.129P2-Apoetm1Unc/J       | The Jackson Laboratory Cat# 002052    | C57BL/6J          | Female |
| B6.129S7-Ldlrtm1Her/J       | The Jackson Laboratory Cat# 002207    | C57BL/6J          | Female |
| B6.129S2-Ifnar1tm1Agt/Mmjax | The Jackson Laboratory Cat# 32045-JAX | C57BL/6J          | Female |
| C57BL/6-Tg(APOA1)1Rub/J     | The Jackson Laboratory Cat# 001927    | C57BL/6J          | Female |

### Animal breeding

|                        | Species                 | Vendor or Source                   | Background Strain | Other Information                                                         |
|------------------------|-------------------------|------------------------------------|-------------------|---------------------------------------------------------------------------|
| <b>Parent - Male</b>   | C57BL/6J                | The Jackson Laboratory Cat# 000664 | C57BL/6J          |                                                                           |
| <b>Parent - Female</b> | C57BL/6J                | The Jackson Laboratory Cat# 000664 | C57BL/6J          |                                                                           |
| <b>Parent - Male</b>   | B6.129S7-Ldlrtm1Her/J   | The Jackson Laboratory Cat# 002052 | C57BL/6J          | These mice we crossed to generate APOA1Tg Ldlr-/- and Ldlr-/- littermates |
| <b>Parent - Female</b> | C57BL/6-Tg(APOA1)1Rub/J | The Jackson Laboratory Cat# 001927 | C57BL/6J          |                                                                           |

### Antibodies

| Target antigen | Vendor or Source | Catalog #  | Working concentration              | Lot # (preferred but not required) |
|----------------|------------------|------------|------------------------------------|------------------------------------|
| IκBα           | Cell signaling   | Cat # 9242 | Not available<br>1:1000 from stock |                                    |
| p-p38 MAPK     | Cell signaling   | Cat # 4511 | Not available<br>1:1000 from stock |                                    |
| p38 MAPK       | Cell signaling   | Cat # 8690 | Not available<br>1:2000 from stock |                                    |
| p-ERK1/2       | Cell signaling   | Cat # 4370 | Not available<br>1:1000 from stock |                                    |
| ERK1/2         | Cell signaling   | Cat # 4695 | Not available<br>1:2000 from stock |                                    |
| p-JNK1/2       | Cell signaling   | Cat # 4668 | Not available<br>1:1000 from stock |                                    |

|                                           |                             |                  |                                     |  |
|-------------------------------------------|-----------------------------|------------------|-------------------------------------|--|
| JNK1/2                                    | Cell signaling              | Cat # 9252       | Not available<br>1:1000 from stock  |  |
| p-IRF3                                    | Cell signaling              | Cat # 4947       | Not available<br>1:1000 from stock  |  |
| IRF3                                      | Cell signaling              | Cat # 4302       | Not available<br>1:2000 from stock  |  |
| p-IRF7                                    | Cell signaling              | Cat # 24129      | Not available 1:500<br>from stock   |  |
| IRF7                                      | Abcam                       | Cat # ab62505    | Not available<br>1:1000 from stock  |  |
| p-STAT1                                   | Cell signaling              | Cat # 9167       | Not available<br>1:1000 from stock  |  |
| STAT1                                     | Cell signaling              | Cat # 14994      | Not available<br>1:2000 from stock  |  |
| p-STAT3                                   | Cell signaling              | Cat # 9131       | Not available<br>1:1000 from stock  |  |
| STAT3                                     | Cell signaling              | Cat # 4904       | Not available<br>1:2000 from stock  |  |
| Ire1a                                     | Cell signaling              | Cat # 3294       | Not available 1:500<br>from stock   |  |
| TLR4                                      | Cell signaling              | Cat # 14358      | Not available<br>1:1000 from stock  |  |
| IFNAR1                                    | Santa Cruz<br>Biotechnology | Cat # sc-7391    | 0.4 µg/ml                           |  |
| IFIT3                                     | EMD Millipore               | Cat # 1 ABF1048  | Not available<br>1:1000 from stock  |  |
| β-actin                                   | Sigma                       | Cat # A5441      | Not available<br>1:8000 from stock  |  |
| anti-rabbit IgG<br>HRP-linked<br>antibody | Cell signaling              | Cat # 7074       | Not available<br>1:5000 from stock  |  |
| anti-mouse IgG<br>HRP-linked<br>antibody  | GE Healthcare               | Cat # NA931      | Not available<br>1:10000 from stock |  |
| F4/80-Pacific Blue<br>clone BM8           | Biolegend                   | Cat # 123124     | 2.5 µg/ml                           |  |
| TLR4-PE/Cy7<br>clone SA15-21              | Biolegend                   | Cat # 145408     | 1 µg/ml                             |  |
| anti-CD16/CD32<br>mAb                     | eBiosciences                | Cat # 14-0161-82 | 0.25 µg/ml                          |  |
| PE-Cy7-labeled<br>F4/80 clone BM8         | eBiosciences                | Cat # 25-4801-82 | 0.1 µg/ml                           |  |
| APC-labeled Ly-6C<br>clone 1A8            | eBiosciences                | Cat # 17-5932-80 | 0.1 µg/ml                           |  |
| PE-labeled CD11b<br>clone M1/70           | eBiosciences                | Cat # 12-0112-82 | 0.05 µg/ml                          |  |
| FITC-labeled<br>CD45 clone 30-<br>F11     | eBiosciences                | Cat # 11-0451-82 | 0.25 µg/ml                          |  |

## Cultured Cells

| Name                            | Vendor or Source                           | Sex (F, M, or unknown) |
|---------------------------------|--------------------------------------------|------------------------|
| Human THP-1 monocytic cell line | ATCC Cat# ATCC® TIB-202                    | Male                   |
| mouse J774 macrophages          | ATCC Cat# J774A.1 (ATCC® TIB-67)           | Female                 |
| Bone marrow derived macrophages | Derived from mouse strains described above | Female                 |
| Peritoneal macrophages          | Derived from mouse strains described above | Female                 |

## Other reagents and commercial assays

| Name                                                                  | Vendor or Source             | Catalog #       |
|-----------------------------------------------------------------------|------------------------------|-----------------|
| Lipopolysaccharide                                                    | Cell Signaling               | Cat# 14011      |
| Lipopolysaccharide ultrapure                                          | List Biological Laboratories | Cat# NC9633766  |
| phorbol 12-myristate 13-acetate (PMA)                                 | Sigma                        | Cat# P8139      |
| Lipofectamine RNAiMAX                                                 | Thermo                       | Cat# 13778075   |
| BIRB0796                                                              | AXON Medchem                 | Cat# 1358       |
| Recombinant mouse IFN $\beta$                                         | R&D systems                  | Cat# 8234-MB    |
| Thioglycollate                                                        | BD                           | Cat# BD 292788  |
| Selonsertib                                                           | Selleckchem                  | Cat# S8292      |
| Sodium phenylbutyrate (4PBA)                                          | Sigma                        | Cat# SML0309    |
| IRE1 Inhibitor IV, KIRA6                                              | EMD Millipore                | Cat# 532281     |
| IRE1 Inhibitor III, 4 $\mu$ 8C                                        | EMD Millipore                | Cat# 412512     |
| PKC inhibitor Ro31-8425                                               | Sigma                        | Cat# 557514     |
| Tunicamycin                                                           | Sigma                        | Cat# SML1287    |
| Chloroquine                                                           | Invivogen                    | Cat# tlrl-chq   |
| MG132                                                                 | Sigma                        | Cat# M7449      |
| Pepstatin                                                             | Sigma                        | Cat# P5318      |
| Leupeptin                                                             | Sigma                        | Cat# L5793      |
| E64                                                                   | Sigma                        | Cat# E3132      |
| Calpeptin                                                             | Sigma                        | Cat# C8999      |
| Halt Protease inhibitor cocktail                                      | Thermo                       | Cat# 1861278    |
| Halt phosphatase inhibitor cocktail                                   | Thermo                       | Cat# 78427      |
| methyl- $\beta$ -cyclodextrin                                         | Sigma                        | Cat# C4555      |
| methyl- $\beta$ -cyclodextrin complexed with cholesterol              | Sigma                        | Cat# C4951      |
| Fast SYBR Green Master Mix                                            | Thermo                       | Cat# 4385612    |
| Cholesterol                                                           | Sigma                        | Cat# C3045      |
| 1-palmitoyl-2-oleoyl-glycero-3-phosphocholine (POPC)                  | Avanti Polar lipids          | Cat# 850457     |
| human acetylated LDL                                                  | Kalen Biomedical             | Cat# 770201     |
| cyclic AMP                                                            | Sigma                        | Cat# A6885      |
| acyl-coenzyme A:cholesterol acyltransferase inhibitor (Sandoz 58-035) | Sigma                        | Cat# S9318      |
| BODIPY 493/503                                                        | Invitrogen                   | Cat# D3922      |
| Liberase TH                                                           | Roche                        | Cat# 5401151001 |
| Hyaluronidase                                                         | Sigma                        | Cat# H3506      |

|                                                    |                  |                  |
|----------------------------------------------------|------------------|------------------|
| Deoxyribonuclease I from bovie                     | Sigma            | Cat# DN25        |
| BD Cytotfix/Cytoperm                               | BD Biosciences   | Cat# 554722      |
| BD Perm/Wash                                       | BD Biosciences   | Cat# 554723      |
| RNeasy mini kit                                    | Qiagen           | Cat # 74106      |
| recombinant human M-CSF                            | Peprotech        | Cat # 300-25     |
| Human Serum                                        | Sigma            | Cat # H4522      |
| Ficoll-Pague Plus                                  | GE Healthcare    | Cat # 17144002   |
| Quick-RNA Miniprep                                 | Zymo Research    | Cat# R1055       |
| Nucleospin RNA plus                                | Takara Bio       | Cat# 740984      |
| NEBNext RNA Ultra library prep kit                 | NEB              | Cat# E7530S      |
| BCA protein assay kit                              | Pierce           | Cat# 23225       |
| Supersignal West Pico Chemiluminescent substrate   | Pierce           | Cat# 34578       |
| CD11b microbeads, mouse (and human)                | Miltenyi Biotec  | Cat# 130-049-601 |
| Cholesterol E (total cholesterol assay)            | Wako Diagnostics | Cat# 999-02601   |
| Maxima First Strand cDNA synthesis kit for RT-qPCR | Thermo           | Cat# K1642       |
| Mouse TNF-alpha DuoSet ELISA                       | R&D              | DY410-05         |
| Mouse CCL2/JE/MCP-1 DuoSet ELISA                   | R&D              | DY479-05         |

### Oligonucleotides

| Name                                                                                      | Vendor or Source | Catalog #             |
|-------------------------------------------------------------------------------------------|------------------|-----------------------|
| Primers for Quantitative PCR , see Supplemental Table V                                   | This paper       |                       |
| Antisense LNA Gapmer oligonucleotide targeting mouse Ask1 (NM_008580.4): GATAGATTTTGGTTGG | Qiagen           | 339511 LG00214119-DDA |
| Antisense LNA Gapmer oligonucleotide negative control A: AACACGTCTATACGC                  | Qiagen           | 339515 LG00000002-DDA |

### Software and algorithms

| Name                  | Vendor or Source    | link                                                                                                                        |
|-----------------------|---------------------|-----------------------------------------------------------------------------------------------------------------------------|
| Graphpad Prism v7.0.3 | GraphPad Software   | <a href="https://www.graphpad.com/scientificsoftware/prism/">https://www.graphpad.com/scientificsoftware/prism/</a>         |
| PANTHER GO            | Thomas et al., 2003 | <a href="http://www.geneontology.org/page/goenrichment-analysis">http://www.geneontology.org/page/goenrichment-analysis</a> |
| HOMER v4.9.1          | Heinz et al., 2010  | <a href="http://homer.ucsd.edu/homer/">http://homer.ucsd.edu/homer/</a>                                                     |

### Deposited data

| Name         | Vendor or Source | link           |
|--------------|------------------|----------------|
| rHDL RNA-seq | This paper       | GEO: GSE129347 |
